# Supplementary material for: The Transcription Factor Nrf2 Protects Angiogenic Capacity of Endothelial Colony-Forming Cells in High-Oxygen Radical Stress Conditions
Source: Hindawi journal article supplement (doi:10.1155/2017/4680612), 2017-01-01
Supplement: f1 [file 4680612.f1.pdf]

# Supplementary Information

| Gene                      | Direction | Sequence                 | Tm (°C) |
|---------------------------|-----------|--------------------------|---------|
| GCLC                      | Forward   | TCCTGGACTGATCCCAATTC     | 60      |
| GCLC                      | Reverse   | TGCGATAAACTCCCTCATCC     | 60      |
| GCLM                      | Forward   | GTTGGGATACTGTGGGCTCT     | 60      |
| GCLM                      | Reverse   | CGGCCCTGAATTAAGGATTT     | 60      |
| HO-1                      | Forward   | ACATCTATGTGGCCCTGGAG     | 60      |
| HO-1                      | Reverse   | CTGGTGTGTAGGGGATGACC     | 60      |
| Keap1                     | Forward   | GTGTGGAAAGAGCAGGCTTC     | 60      |
| Keap1                     | Reverse   | TGGGAACCACATTTCCAGAG     | 60      |
| NQO1                      | Forward   | TACTATGGGATGGGGTCCAG     | 60      |
| NQO1                      | Reverse   | TCTCCCATTTTTTCAGGCAAC    | 60      |
| Nrf2                      | Forward   | GAGAGCCCAGTCTTCATTGC     | 60      |
| Nrf2                      | Reverse   | TTGGCTTCTGGACTTGGAAC     | 60      |
| VEGF                      | Forward   | GCCTTGCTGCTCTACCTCCA     | 60      |
| VEGF                      | Reverse   | CAAGGCCACAGGGATTTT       | 60      |
| CXCR4                     | Forward   | TTTTCTTCACGGAAACAGGG     | 60      |
| CXCR4                     | Reverse   | GTTACCATGGAGGGGATCAG     | 60      |
| Catalase                  | Forward   | TTTCCCAGGAAGATCCTGAC     | 60      |
| Catalase                  | Reverse   | ACCTTGGTGAGATCGAATGG     | 60      |
| eNOS                      | Forward   | CTCATGGGCACGGTGATG       | 60      |
| eNOS                      | Reverse   | ACCACGTCATACTCATCCATACAC | 60      |
| Cathepsin L               | Forward   | TGGCCTAATGGATTATGCTTTCC  | 60      |
| Cathepsin L               | Reverse   | ATGACCTGCATCAATAGCAACA   | 60      |
| EMMPRIN                   | Forward   | TTCACCTACCGTAGAAGACCTTGG | 60      |
| EMMPRIN                   | Reverse   | GTTGATGTGTTCTGACGACTTCA  | 60      |
| IL-8                      | Forward   | GAATGGGTTTGCTAGAATGTGATA | 60      |
| IL-8                      | Reverse   | CAGACTAGGGTTGCCAGATTTAAC | 60      |
| <b>Housekeeping Genes</b> |           |                          |         |
| PPIA                      | Forward   | ATGGTCAACCCCAACCGTGT     | 60      |
| PPIA                      | Reverse   | TCTGCTGTCTTTGGGACCTTGTC  | 60      |
| P0                        | Forward   | TGCACAATGGCAGCATCTAC     | 60      |
| P0                        | Reverse   | ATCCGTCTCCACAGACAAGG     | 60      |
| HPRT1                     | Forward   | TGACACTGGCAAAACAATGCA    | 60      |
| HPRT1                     | Reverse   | GGTCCTTTTCACCAGCAAGCT    | 60      |

Table 1: **Primer sequences**

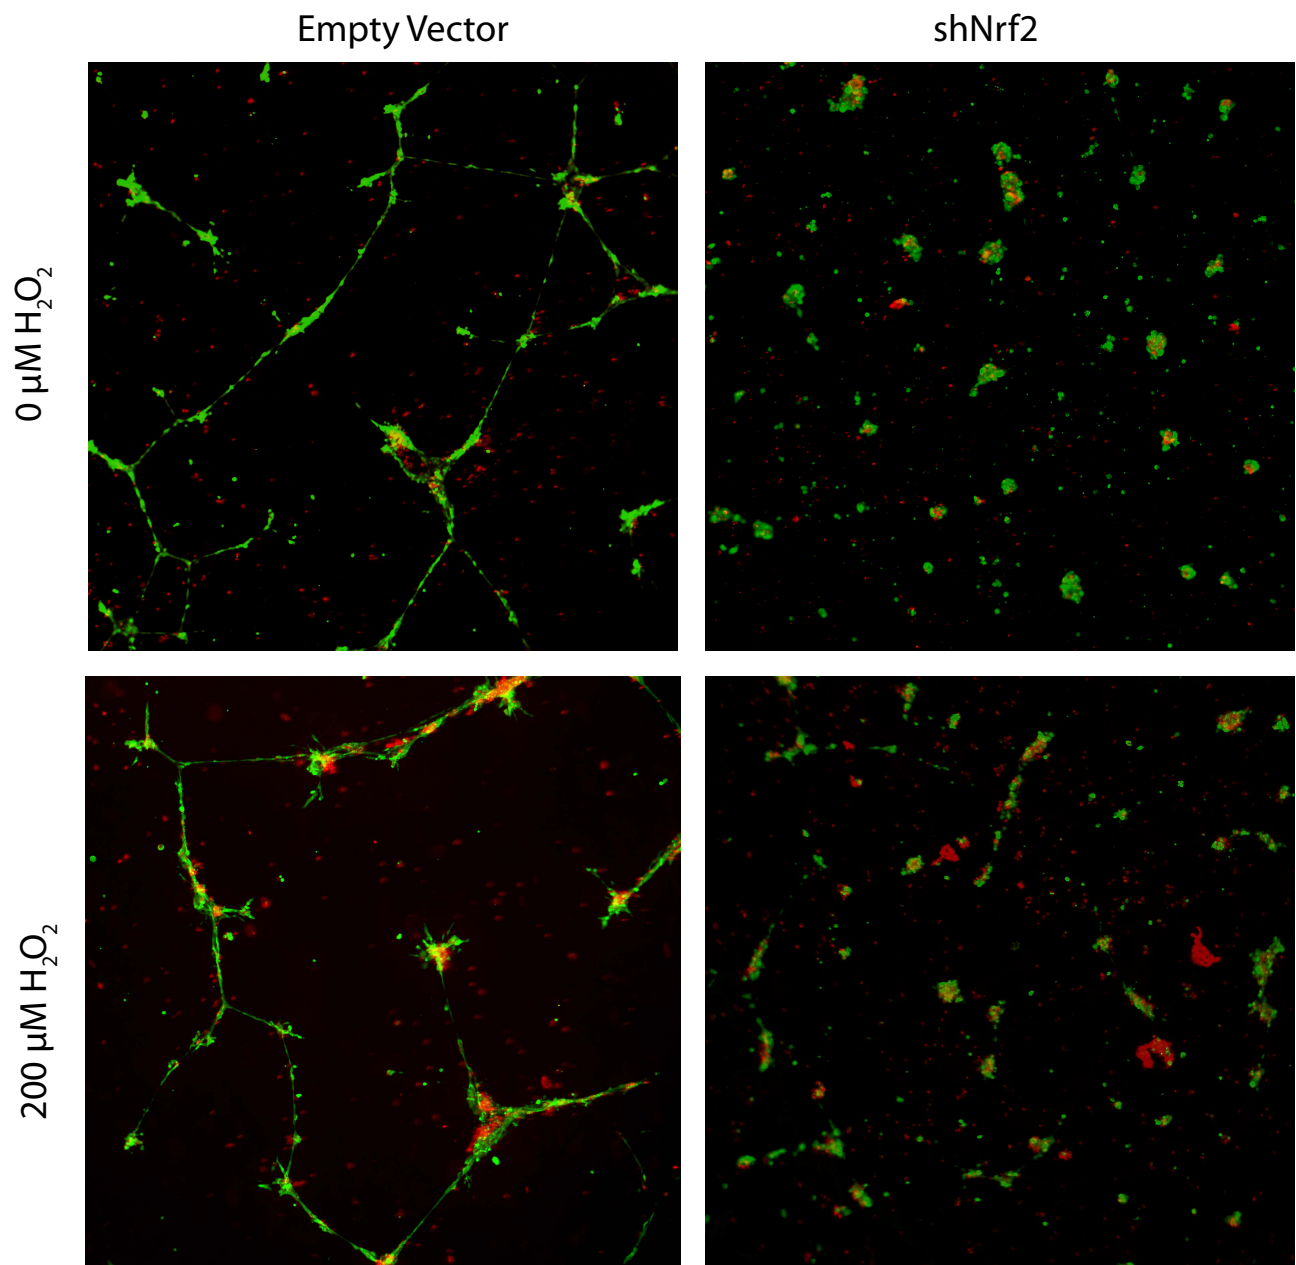

Figure 1: Viability stain of ECFCs at 6 hours after initiation of a tubule forming experiment on matrigel. Green cells are alive, whereas red cells are dead. While Nrf2 knockdown disrupts tubule formation, viability is preserved, even in high concentrations of  $\text{H}_2\text{O}_2$

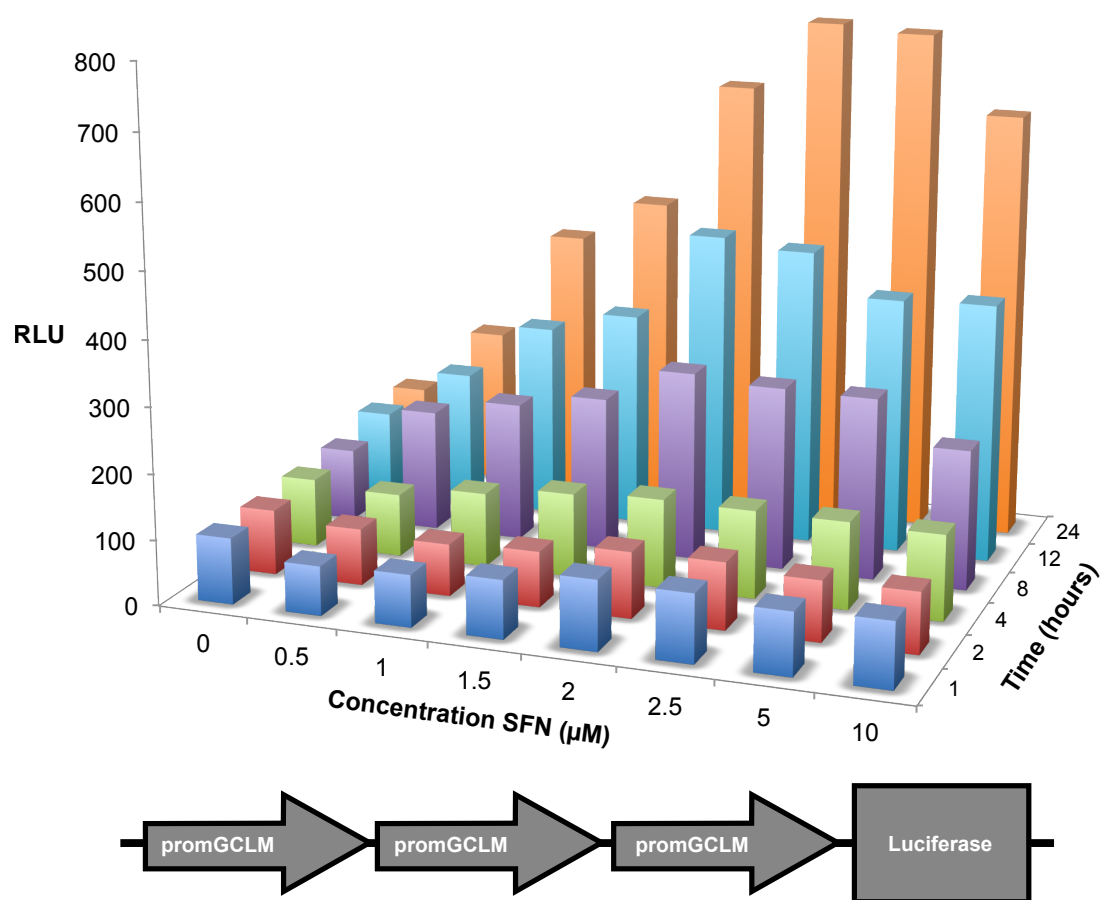

Figure 2: **Time- and Dose-dependent ARE activation:** ECFCs of three donors were transduced with a luciferase-reporter construct driven by three GCLM promoter sequences (lower panel). Luciferase signal after incubation with different doses of Nrf2 pathway activator Sulforaphane (SFN) was measured at different time-points over the course of 24h.

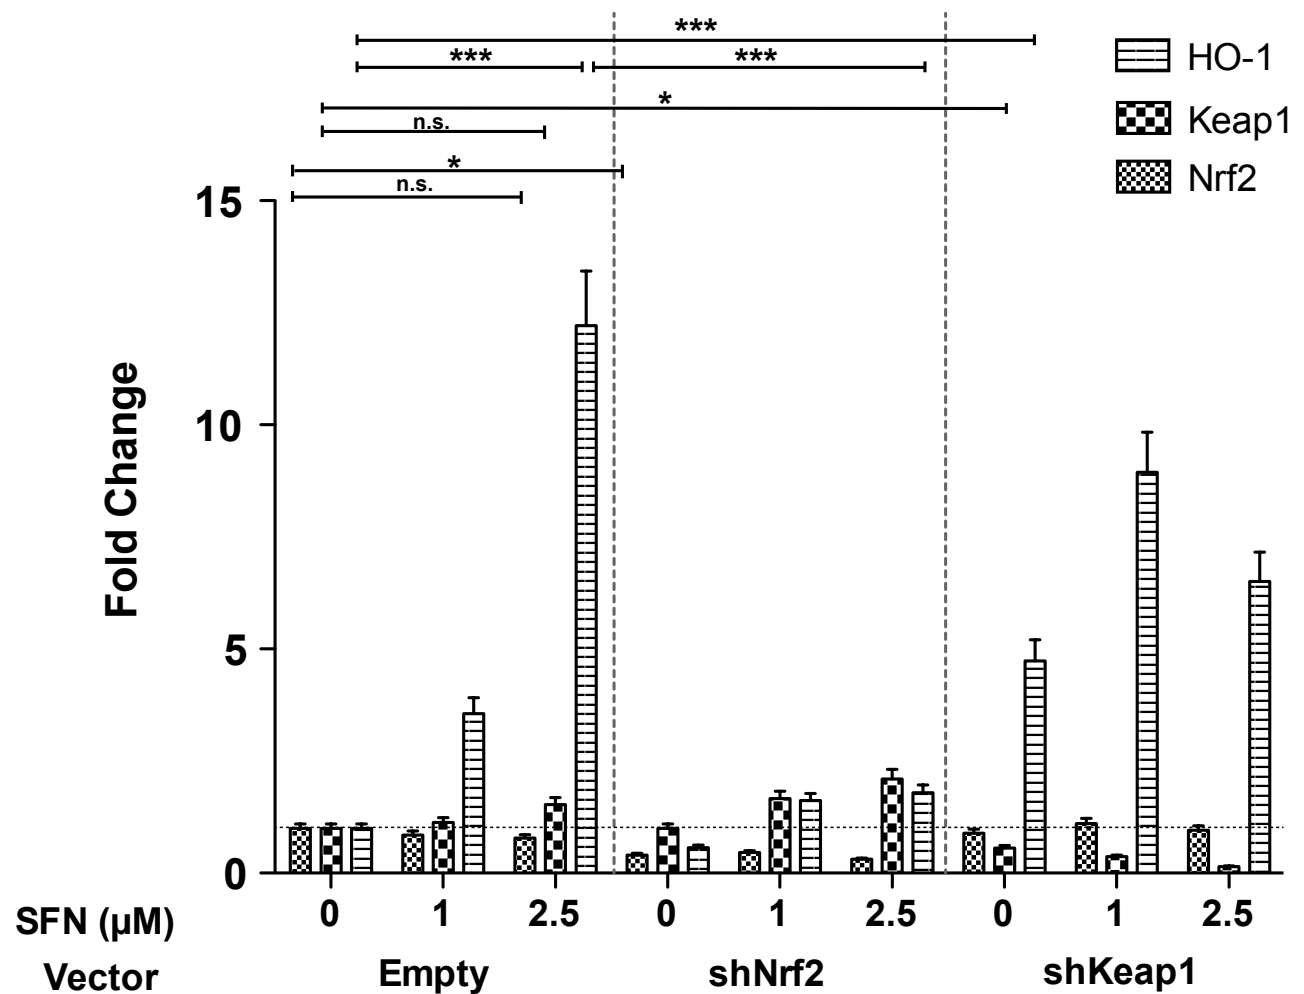

**Figure 3: Effects of Nrf2 and Keap1 knockdown on gene expression.** Nrf2 and Keap1 expression is not modulated by SFN. Significant knockdown was achieved by shRNA transduction ( $p < 0.05$  in both shNrf2 and shKeap1). HO-1 expression is increased after exposure to SFN ( $p < 0.001$ ), which is greatly reduced with Nrf2 knockdown. Knockdown of Keap1 increased HO-1 expression at baseline to an elevated level and no further upregulation of gene expression was observed in response to SFN stimulation. Graphs represent mean  $\pm$  S.E.M., data represent 3 independent biological replicates.
